# Supplementary material
Source: PubMed Central journal article supplement (PMC3477223)
Supplement: supp_mol.112.079889_Supplemental_Data1.pdf [file supp_mol.112.079889_Supplemental_Data1.pdf]

**Molecular characteristics of CTA056, a novel Itk inhibitor which selectively targets malignant T cells and modulates oncomirs**

Wenchang Guo, Ruiwu Liu, Yoko Ono, Aihong Ma, Anthony Martinez, Eduardo Sanchez, Yan Wang, Wenzhe Huang, Anisha Mazloom, Jixian Li, Jinying Ning, Emanuel Maverakis, Kit S. Lam, and Hsing-Jien Kung

**Supplemental Figure 1**

A

**Induction of tumor suppressive MiRs and decrease of oncogenic MiRs in Jurkat cells following treatment with CTA056**

| Tumor suppressive MicroRNAs | Fold change | Relation to cancer                                 | References                            |
|-----------------------------|-------------|----------------------------------------------------|---------------------------------------|
| hsa-miR-135a*               | 285.3       | Downregulation of JAK2                             | Navarro et al., 2009                  |
| hsa-miR-1224-5p             | 112.9       | Downregulation of TNF $\alpha$                     | Niu et al., 2011                      |
| hsa-miR-1226*               | 66.9        | Downregulation of mucin1                           | Jin et al., 2010                      |
| hsa-miR-487b                | 59.4        | Downregulated in high risk neuroblastoma           | Gattolliat et al., 2011               |
| hsa-miR-520b                | 57.1        | Inhibition of MEKK2 and IL-8                       | Hu et al., 2011<br>Zhang et al., 2012 |
| hsa-miR-365*                | 28.8        | Downregulation of BCL2                             | Nie et al., 2012                      |
| hsa-miR-195*                | 27.0        | Downregulation of BCL2                             | Chen et al., 2011                     |
| hsa-miR-601                 | 26.7        | Inhibition of NFkB                                 | Ohdaira et al., 2009                  |
| hsa-miR-370                 | 26.0        | Downregulation of TGF $\beta$ -RII                 | Lo et al., 2012                       |
| hsa-miR-198                 | 25.9        | Inhibition of HGF/c-MET                            | Tan et al., 2011                      |
| hsa-miR-622                 | 14.9        | Inhibition of k-RAS                                | Han et al., 2012                      |
| hsa-miR-623                 | 14.1        | Upregulated in drug sensitive gastric cancer cells | Belian et al., 2010                   |
| hsa-let-7d*                 | 11.5        | Downregulation of KRAS                             | Yu et al., 2011<br>Jiao et al., 2012  |
| hsa-miR-630                 | 10.7        | Upregulated by NGX6                                | Wang et al., 2010                     |
| hsa-miR-150*                | 7.8         | Downregulation of NOTCH3                           | Ghisi et al., 2011                    |
| hsa-miR-1246                | 5.9         | Upregulated by p53                                 | Zhang et al., 2011                    |
| hsa-miR-494                 | 4.3         | Downregulation of KIT                              | Kim et al., 2011                      |
| hsa-miR-1915                | 2.5         | Inhibition of BCL2                                 | Xu et al., 2011                       |
| hsa-miR-874                 | 2.5         | Downregulation of PPP1CA                           | Nohata et al., 2011                   |
| hsa-miR-2861                | 2.2         | Downregulation of HDAC5                            | Li et al., 2009                       |
| Oncogenic MicroRNAs         | Fold change | Relation to cancer                                 | References                            |
| hsa-miR-142-3p              | -2.2        | Downregulation of cAMP/ PKA and GR $\alpha$        | Lv et al., 2011                       |
| hsa-miR-93                  | -2.2        | Downregulation of p53                              | Yeung et al., 2008                    |
| hsa-miR-191*                | -2.3        | Downregulation of TIMP3                            | He et al., 2011                       |
| hsa-miR-30e*                | -2.5        | Downregulation of I $\kappa$ B $\alpha$            | Jiang et al., 2012                    |
| hsa-miR-744                 | -3.3        | Upregulation of Cyclin B1                          | Huang et al., 2012                    |
| hsa-miR-15b*                | -37.8       | Induced by E2F                                     | Myklebust et al., 2011                |
| hsa-miR-450a                | -68.5       | Upregulated in EMT                                 | Castilla et al., 2011                 |
| hsa-miR-378*                | -69.7       | Mediates cMyc activity, inhibits TOB2              | Feng et al., 2011                     |
| hsa-miR-421                 | -76.2       | Downregulation of ATM                              | Hu et al., 2010                       |

B

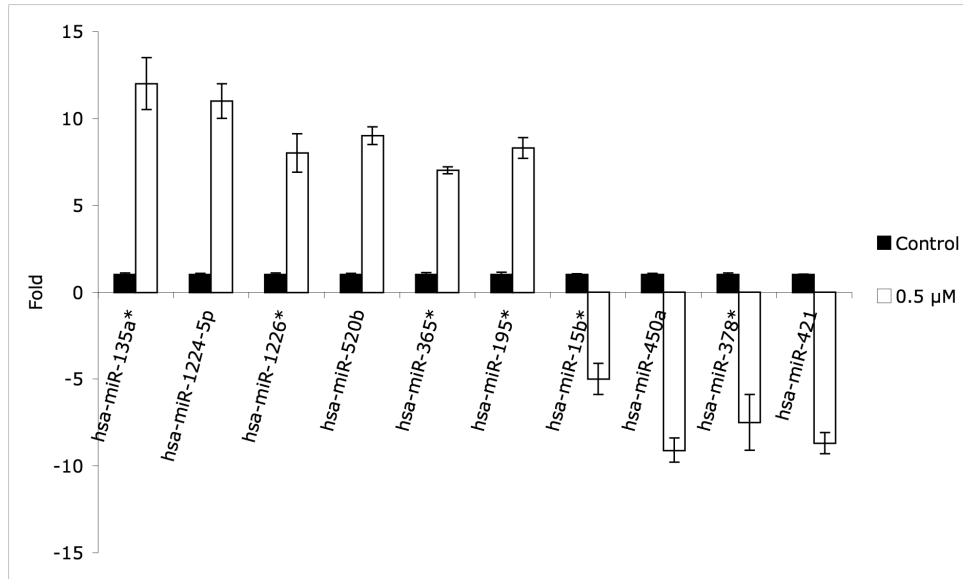

**Figure legend:** Jurkat cells were treated with 0.5  $\mu$ M CTA056 for 8h. RNA was isolated and miR profile was examined using miR array. The fold change between treatment and control was indicated. The function of the miRs was obtained through Pubmed study (A). The miRs with the most significant changes from miR array were further confirmed using real-time PCR (B). For up regulation, fold = treatment/control; for down regulation, fold = control/treatment. Columns, mean; bars, standard deviation; n=3.

## References

Belian E, Kurucz R, Treue D, Lage H (2010) Effect of YB-1 on the regulation of micro RNA expression in drug-sensitive and drug-resistant gastric carcinoma cells. *Anticancer Res.* 30(2):629-33.

Chen YQ, Wang XX, Yao XM, Zhang DL, Yang XF, Tian SF, Wang NS (2011) MicroRNA-195 promotes apoptosis in mouse podocytes via enhanced caspase activity driven by BCL2 insufficiency. *Am J Nephrol.* 34(6):549-59.

Feng M, Li Z, Aau M, Wong CH, Yang X, Yu Q (2011) Myc/miR-378/TOB2/cyclin D1 functional module regulates oncogenic transformation. *Oncogene.* 30(19):2242-51.

Castilla MÁ, Moreno-Bueno G, Romero-Pérez L, Van De Vijver K, Biscuola M, López-García MÁ, Prat J, Matías-Guiu X, Cano A, Oliva E, Palacios J (2011) Micro-RNA signature of the epithelial-mesenchymal transition in endometrial carcinosarcoma. *J Pathol.* 223(1):72-80.

Gattolliat CH, Thomas L, Ciafrè SA, Meurice G, Le Teuff G, Job B, Richon C, Combaret V, Dessen P, Valteau-Couanet D, May E, Busson P, Douc-Rasy S, Bénard J (2011) Expression of miR-487b and miR-410 encoded by 14q32.31 locus is a prognostic marker in neuroblastoma. *Br J Cancer.* 105(9):1352-61.

Ghisi M, Corradin A, Basso K, Frasson C, Serafin V, Mukherjee S, Mussolin L, Ruggero K, Bonanno L, Guffanti A, De Bellis G, Gerosa G, Stellin G, D'Agostino DM, Basso G, Bronte V, Indraccolo S, Amadori A, Zanovello P (2011) Modulation of microRNA expression in human T-cell development: targeting of NOTCH3 by miR-150. *Blood.* 117(26):7053-62.

Han Z, Yang Q, Liu B, Wu J, Li Y, Yang C, Jiang Y (2012) MicroRNA-622 functions as a tumor suppressor by targeting K-Ras and enhancing the anticarcinogenic effect of resveratrol. *Carcinogenesis.* 33(1):131-9.

He Y, Cui Y, Wang W, Gu J, Guo S, Ma K, Luo X (2011) Hypomethylation of the hsa-miR-191 locus causes high expression of hsa-mir-191 and promotes the epithelial-to-mesenchymal transition in hepatocellular carcinoma. *Neoplasia.* 13(9):841-53.

Hu H, Du L, Nagabayashi G, Seeger RC, Gatti RA (2010) ATM is down-regulated by N-Myc-regulated microRNA-421. *Proc Natl Acad Sci U S A.* 107(4):1506-11.

Hu N, Zhang J, Cui W, Kong G, Zhang S, Yue L, Bai X, Zhang Z, Zhang W, Zhang X, Ye L (2011) miR-520b regulates migration of breast cancer cells by targeting hepatitis B X-interacting protein and interleukin-8. *J Biol Chem.* 286(15):13714-22.

MOL #79889

Huang V, Place RF, Portnoy V, Wang J, Qi Z, Jia Z, Yu A, Shuman M, Yu J, Li LC (2012) Upregulation of Cyclin B1 by miRNA and its implications in cancer. *Nucleic Acids Res.* 40(4):1695-707.

Jiang L, Lin C, Song L, Wu J, Chen B, Ying Z, Fang L, Yan X, He M, Li J, Li M (2012) MicroRNA-30e\* promotes human glioma cell invasiveness in an orthotopic xenotransplantation model by disrupting the NF- $\kappa$ B/I $\kappa$ B $\alpha$  negative feedback loop. *J Clin Invest.* 122(1):33-47.

Jiao LR, Frampton AE, Jacob J, Pellegrino L, Krell J, Giamas G, Tsim N, Vlavianos P, Cohen P, Ahmad R, Keller A, Habib NA, Stebbing J, Castellano L (2012) MicroRNAs Targeting Oncogenes Are Down-Regulated in Pancreatic Malignant Transformation from Benign Tumors. *PLoS One.* 7(2):e32068.

Jin C, Rajabi H, Kufe D (2010) miR-1226 targets expression of the mucin 1 oncoprotein and induces cell death. *Int J Oncol.* 37(1):61-9.

Kim WK, Park M, Kim YK, Tae YK, Yang HK, Lee JM, Kim H (2011) MicroRNA-494 downregulates KIT and inhibits gastrointestinal stromal tumor cell proliferation. *Clin Cancer Res.* 17(24):7584-94.

Li H, Xie H, Liu W, Hu R, Huang B, Tan YF, Xu K, Sheng ZF, Zhou HD, Wu XP, Luo XH (2009) A novel microRNA targeting HDAC5 regulates osteoblast differentiation in mice and contributes to primary osteoporosis in humans. *J Clin Invest.* 119(12):3666-77.

Lo SS, Hung PS, Chen JH, Tu HF, Fang WL, Chen CY, Chen WT, Gong NR, Wu CW (2012) Overexpression of miR-370 and downregulation of its novel target TGF $\beta$ -RII contribute to the progression of gastric carcinoma. *Oncogene.* 31(2):226-37.

Lv M, Zhang X, Jia H, Li D, Zhang B, Zhang H, Hong M, Jiang T, Jiang Q, Lu J, Huang X, Huang B (2011) An oncogenic role of miR-142-3p in human T-cell acute lymphoblastic leukemia (T-ALL) by targeting glucocorticoid receptor- $\alpha$  and cAMP/PKA pathways. *Leukemia.*

Myklebust MP, Bruland O, Fluge Ø, Skarstein A, Balteskard L, Dahl O (2011) MicroRNA-15b is induced with E2F-controlled genes in HPV-related cancer. *Br J Cancer.* 105(11):1719-25.

Navarro A, Diaz T, Martinez A, Gaya A, Pons A, Gel B, Codony C, Ferrer G, Martinez C, Montserrat E, Monzo M (2009) Regulation of JAK2 by miR-135a: prognostic impact in classic Hodgkin lymphoma. *Blood.* 114(14):2945-51.

MOL #79889

Nie J, Liu L, Zheng W, Chen L, Wu X, Xu Y, Du X, Han W (2012) microRNA-365, down-regulated in colon cancer, inhibits cell cycle progression and promotes apoptosis of colon cancer cells by probably targeting Cyclin D1 and Bcl-2. *Carcinogenesis*. 33(1):220-5.

Niu Y, Mo D, Qin L, Wang C, Li A, Zhao X, Wang X, Xiao S, Wang Q, Xie Y, He Z, Cong P, Chen Y (2011) Lipopolysaccharide-induced miR-1224 negatively regulates tumour necrosis factor- $\alpha$  gene expression by modulating Sp1. *Immunology*. 133(1):8-20.

Nohata N, Hanazawa T, Kikkawa N, Sakurai D, Fujimura L, Chiyomaru T, Kawakami K, Yoshino H, Enokida H, Nakagawa M, Katayama A, Harabuchi Y, Okamoto Y, Seki N (2011) Tumour suppressive microRNA-874 regulates novel cancer networks in maxillary sinus squamous cell carcinoma. *Br J Cancer*. 105(6):833-41.

Ohdaira H, Nakagawa H, Yoshida K (2009) Profiling of molecular pathways regulated by microRNA 601. *Comput Biol Chem*. 33(6):429-33.

Tan S, Li R, Ding K, Lobie PE, Zhu T (2011) miR-198 inhibits migration and invasion of hepatocellular carcinoma cells by targeting the HGF/c-MET pathway. *FEBS Lett*. 585(14):2229-34.

Wang XY, Wu MH, Liu F, Li Y, Li N, Li GY, Shen SR. (2010) Differential miRNA expression and their target genes between NGX6-positive and negative colon cancer cells. *Mol Cell Biochem*. 345(1-2):283-90.

Xu K, Liang X, Cui D, Wu Y, Shi W, Liu J (2011) miR-1915 inhibits Bcl-2 to modulate multidrug resistance by increasing drug-sensitivity in human colorectal carcinoma cells. *Mol Carcinog*.

Yeung ML, Yasunaga J, Bennasser Y, Dusetti N, Harris D, Ahmad N, Matsuoka M, Jeang KT (2008) Roles for microRNAs, miR-93 and miR-130b, and tumor protein 53-induced nuclear protein 1 tumor suppressor in cell growth dysregulation by human T-cell lymphotropic virus 1. *Cancer Res*. 68(21):8976-85.

Yu ML, Wang JF, Wang GK, You XH, Zhao XX, Jing Q, Qin YW (2011) Vascular smooth muscle cell proliferation is influenced by let-7d microRNA and its interaction with KRAS. *Circ J*. 75(3):703-9.

Zhang W, Kong G, Zhang J, Wang T, Ye L, Zhang X (2012) MicroRNA-520b Inhibits Growth of Hepatoma Cells by Targeting MEKK2 and Cyclin D1. *PLoS One*. 7(2):e31450.

Zhang Y, Liao JM, Zeng SX, Lu H (2011) p53 downregulates Down syndrome-associated DYRK1A through miR-1246. *EMBO*. 12(8):811-7.
